# Supplementary material
Source: MDPI journal article supplement (https://www.mdpi.com/2311-7524/10/2/155)
Supplement: s1 [file s1 › horticulturae-2789840-supplementary.pdf]

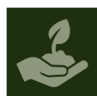**Table S1.** Minimum, average, and maximum temperature (°C) and rainfall (mm) during the experiment in Londrina, Paraná, Brazil.

| Date           | MinT(°C) | AveT(°C) | MaxT(°C) | Rainfall (mm) |
|----------------|----------|----------|----------|---------------|
| April 29, 2021 | 13.0     | 20.5     | 28.0     | 0.0           |
| April 28, 2021 | 12.0     | 20.0     | 28.0     | 0.0           |
| April 27, 2021 | 15.0     | 21.5     | 28.0     | 0.0           |
| April 26, 2021 | 15.0     | 21.0     | 27.0     | 0.4           |
| April 25, 2021 | 16.0     | 21.0     | 26.0     | 0.7           |
| April 24, 2021 | 15.0     | 21.5     | 28.0     | 0.5           |
| April 23, 2021 | 13.0     | 20.0     | 27.0     | 0.0           |
| April 22, 2021 | 14.0     | 21.0     | 28.0     | 0.0           |
| April 21, 2021 | 13.0     | 20.5     | 28.0     | 0.0           |
| April 20, 2021 | 14.0     | 21.0     | 28.0     | 0.0           |
| April 19, 2021 | 15.0     | 21.5     | 28.0     | 0.0           |
| April 18, 2021 | 15.0     | 22.5     | 30.0     | 0.0           |
| April 17, 2021 | 16.0     | 23.0     | 30.0     | 2.1           |
| April 16, 2021 | 16.0     | 24.0     | 32.0     | 0.3           |
| April 15, 2021 | 23.0     | 26.0     | 29.0     | 0.5           |
| April 14, 2021 | 15.0     | 22.0     | 29.0     | 0.0           |
| April 13, 2021 | 19.0     | 24.0     | 29.0     | 0.0           |
| April 12, 2021 | 18.0     | 26.0     | 34.0     | 0.0           |
| April 11, 2021 | 16.0     | 24.0     | 32.0     | 0.0           |
| April 10, 2021 | 16.0     | 23.5     | 31.0     | 0.0           |
| April 9, 2021  | 17.0     | 24.0     | 31.0     | 0.0           |
| April 8, 2021  | 17.0     | 23.5     | 30.0     | 0.0           |
| April 7, 2021  | 17.0     | 23.0     | 29.0     | 0.0           |
| April 6, 2021  | 17.0     | 22.0     | 27.0     | 0.0           |
| April 5, 2021  | 16.0     | 23.0     | 30.0     | 0.3           |
| April 4, 2021  | 15.0     | 22.0     | 29.0     | 0.0           |
| April 3, 2021  | 15.0     | 22.0     | 29.0     | 0.0           |
| April 2, 2021  | 14.0     | 21.5     | 29.0     | 0.0           |
| April 1, 2021  | 13.0     | 20.0     | 27.0     | 0.0           |

MinT: minimum temperature; AveT: average temperature; maximum temperature. **Source:** Instituto Nacional de Meteorologia (INMET).

**Table S2.** Minimum, average, and maximum temperature (°C) and rainfall (mm) during the experiment in Bandeirantes, Paraná, Brazil.

| Date          | MinT(°C) | AveT(°C) | MaxT(°C) | Rainfall (mm) |
|---------------|----------|----------|----------|---------------|
| July 5, 2021  | 11.38    | 18.08    | 24.77    | 0.0           |
| July 4, 2021  | 10.45    | 17.26    | 24.06    | 0.0           |
| July 3, 2021  | 9.97     | 18.18    | 26.39    | 0.0           |
| July 2, 2021  | 8.65     | 16.87    | 25.09    | 0.0           |
| July 1, 2021  | 5.18     | 12.98    | 20.77    | 0.0           |
| June 30, 2021 | 2.1      | 9.58     | 17.05    | 0.7           |
| June 29, 2021 | 3.94     | 7.94     | 11.94    | 0.4           |
| June 28, 2021 | 14.16    | 17.33    | 20.49    | 0.2           |
| June 27, 2021 | 16.84    | 22.88    | 28.93    | 0.0           |
| June 26, 2021 | 16.52    | 22.22    | 27.91    | 0.0           |
| June 25, 2021 | 15.69    | 21.32    | 26.95    | 0.0           |
| June 24, 2021 | 12.02    | 18.26    | 24.5     | 0.0           |

|               |       |       |       |      |
|---------------|-------|-------|-------|------|
| June 23, 2021 | 13.72 | 18.18 | 22.64 | 0.0  |
| June 22, 2021 | 14.22 | 18.54 | 22.86 | 2.2  |
| June 21, 2021 | 11.72 | 16.13 | 20.53 | 0.0  |
| June 20, 2021 | 12.48 | 17.26 | 22.04 | 0.0  |
| June 19, 2021 | 13.82 | 16.23 | 18.63 | 0.1  |
| June 18, 2021 | 13.45 | 16.43 | 19.41 | 0.0  |
| June 17, 2021 | 11.09 | 16.81 | 22.54 | 0.0  |
| June 16, 2021 | 10.58 | 16.42 | 22.26 | 0.0  |
| June 15, 2021 | 10.25 | 17.56 | 24.87 | 0.0  |
| June 14, 2021 | 10.51 | 17.28 | 24.05 | 0.0  |
| June 13, 2021 | 10.74 | 16.81 | 22.87 | 0.0  |
| June 12, 2021 | 11.36 | 17.3  | 23.23 | 3.3  |
| June 11, 2021 | 15.82 | 19.79 | 23.75 | 18.6 |
| June 10, 2021 | 16.23 | 18.02 | 19.81 | 22.0 |
| June 9, 2021  | 14.47 | 18.54 | 22.6  | 4.4  |
| June 8, 2021  | 15.61 | 18.23 | 20.84 | 32.4 |
| June 7, 2021  | 15.39 | 18.06 | 20.73 | 33.6 |

MinT: minimum temperature; AveT: average temperature; maximum temperature. **Source:** Agritempo (AGRITEMPO).

**Table S3.** Mean values of total phenolic compounds (absorbance at 517 nm) in arugula subjected to doses of cow urine (with or without) and bokashi (0, 10, 20, and 30 g per group of 10 plants) in experiment carried out in area 1, Londrina, Paraná, Brazil.

| Cow urine | Bokashi doses (g) <sup>ns</sup> |       |       |       |
|-----------|---------------------------------|-------|-------|-------|
|           | 0                               | 10    | 20    | 30    |
| With      | 0.418                           | 0.396 | 0.501 | 0.450 |
| Without   | 0.430                           | 0.409 | 0.456 | 0.413 |

ns: non-significant ( $p > 0.05$ ).

**Table S4.** Mean values of antioxidant activity percentage, evaluated using DPPH (2,2'-diphenyl-1-picrylhydrazyl) method in arugula subjected or not to cow urine (1 %) in experiment carried out in area 1, Londrina, Paraná, Brazil. Data shown in percentage of antioxidant.

| Cow urine | Percentage of antioxidant activity <sup>ns</sup> |
|-----------|--------------------------------------------------|
| With      | 0.639                                            |
| Without   | 0.640                                            |

ns: non-significant ( $p > 0.05$ ).

**Table S5.** Mean values of antioxidant activity percentage, evaluated using DPPH (2,2'-diphenyl-1-picrylhydrazyl) method in arugula subjected to doses bokashi (0, 10, 20, and 30 g per group of 10 plants) in experiment carried out in area 2, Bandeirantes, Paraná, Brazil. Data shown in percentage of antioxidant.

| Cow urine | Bokashi doses (g) <sup>ns</sup> |      |      |      |
|-----------|---------------------------------|------|------|------|
|           | 0                               | 10   | 20   | 30   |
| With      | 0.59                            | 0.62 | 0.63 | 0.64 |
| Without   | 0.59                            | 0.59 | 0.61 | 0.62 |

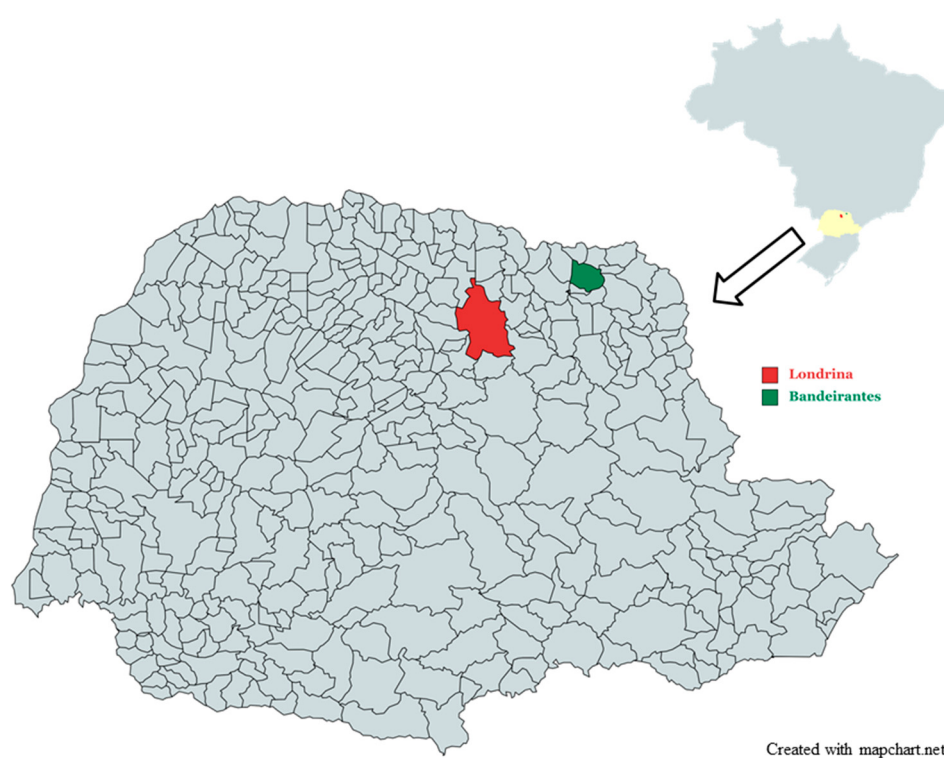

**Figure S1.** Illustration of cities in which experiments were performed. Red: Londrina, Paraná, Brazil; Green: Bandeirantes. The cities are located in Parana state. The smaller map represents Brazil country, with Parana state in yellow. **Source:** mapchart.net.
